# Supplementary material for: Engineered vesicles enhance oral antibiotic absorption in proximal small intestine and mitigate gut dysbiosis
Source: Research Square preprint supplement (doi:10.21203/rs.3.rs-7033003/v1), 2025-07-10
Supplement: Supplementary file 1 [file 68e85d3d0ce8f9a832af7061.docx]

**Supplementary Information**

**Engineered vesicles enhance oral antibiotic absorption in proximal small intestine and mitigate gut dysbiosis**

*Yinglan Yu1, Yongfeng Xu**1, Zehui Yu1,* *Xinrui Liu1, Jiayue Guo1, Min Xiang1, Junmeng Chen**1,2, Riyanto Teguh Widodo2, Lei Luo1**

1College of Pharmaceutical Sciences, Southwest University, Chongqing 400715, China.

2Department of Pharmaceutical Technology, Faculty of Pharmacy, University of Malaya, Kuala Lumpur 50603, Malaysia

* Corresponding Author

E-mail: [drluolei@swu.edu.cn](mailto:drluolei@swu.edu.cn)

**1. Results**


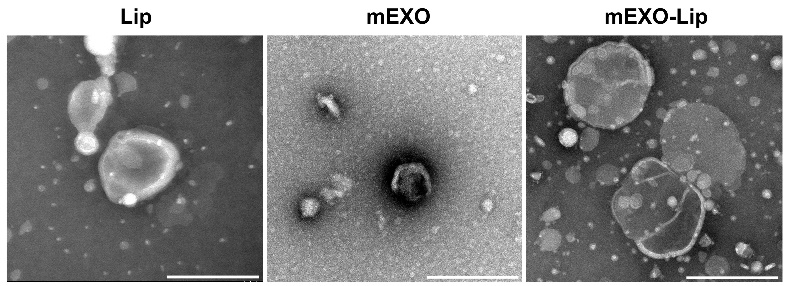


**Supplementary Fig. 1** The transmission electron microscope (TEM) images of Lip, mEXO, and mEXO-Lip. Scale bars, 200 nm.

**Supplementary Fig. 2** Particle size and zeta potential of different vesicles. All values are presented as the mean ± SD (*n* = 3).


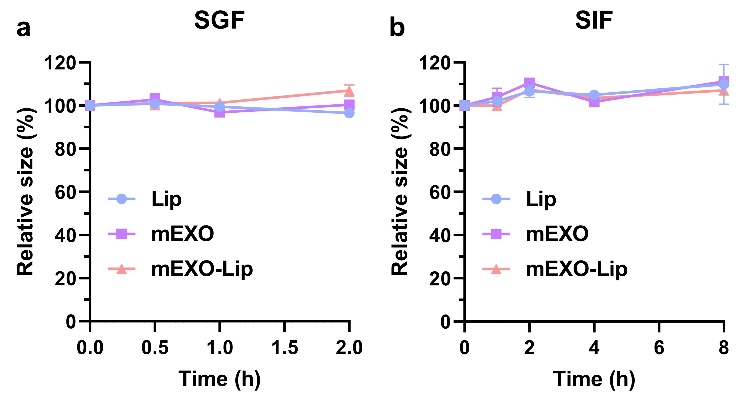


**Supplementary Fig. 3** Particle size changes of different vesicles after incubation with simulated gastric fluid (SGF, **a**) and simulated intestinal fluid (SIF, **b**). All values are presented as the mean ± SD (*n* = 3).


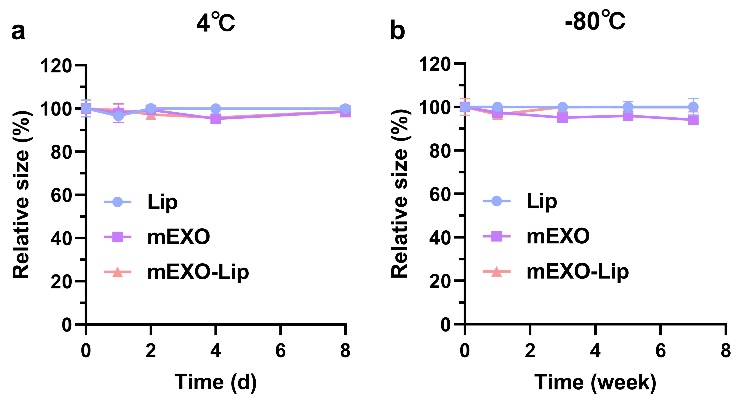


**Supplementary Fig. 4** Particle size changes of different vesicles stored at 4℃ (**a**) and -80℃ (**b**) for 7 days. All values are presented as the mean ± SD (*n* = 3).


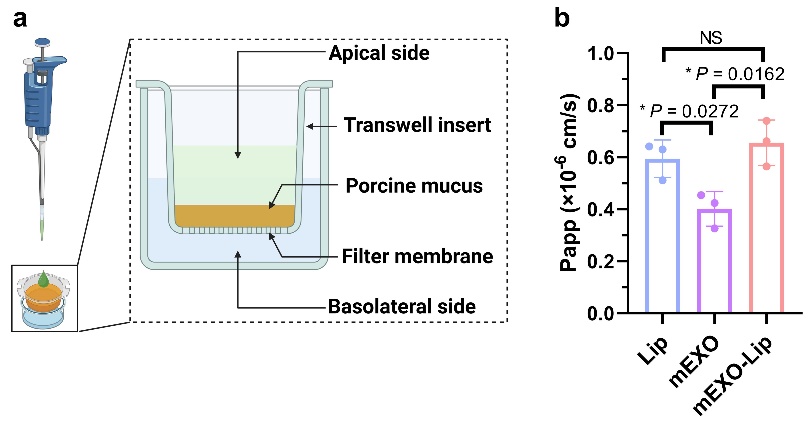


**Supplementary Fig. 5 a**, Schematic diagram of the Tanswell-mucus 3D system. **b**, Quantitative results of different vesicles passing through the Tanswell system. All values are presented as the mean ± SD (*n* = 3). Statistical significance was determined using one-way ANOVA with a Tukey post hoc test. * *P* < 0.05. NS, not significant.

**Supplementary Fig. 6** Quantitative endocytosis of cells incubated with various vesicles. All values are presented as the mean ± SD (*n* = 3). Statistical significance was determined using one-way ANOVA with a Tukey post hoc test. *** *P* < 0.0001.


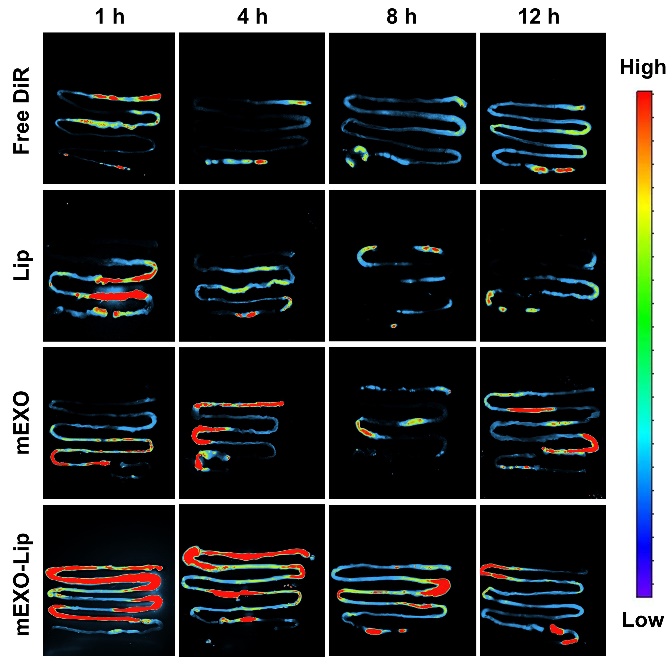


**Supplementary Fig. 7** Representative images of *in vivo* imaging system of intestine from mice orally administered with DiR-loaded vesicles.


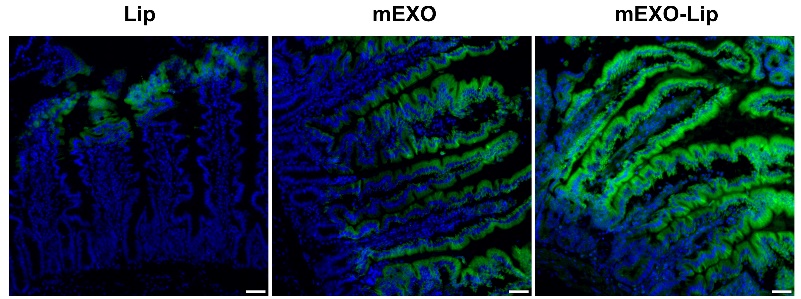


**Supplementary Fig. 8** Representative images of coumarin 6 (C6)-loaded vesicles in theproximal smallintestine at 4 h post administered. Blue: nucleus; Green: C6-labeled vesicles. Scale bars, 50 μm.


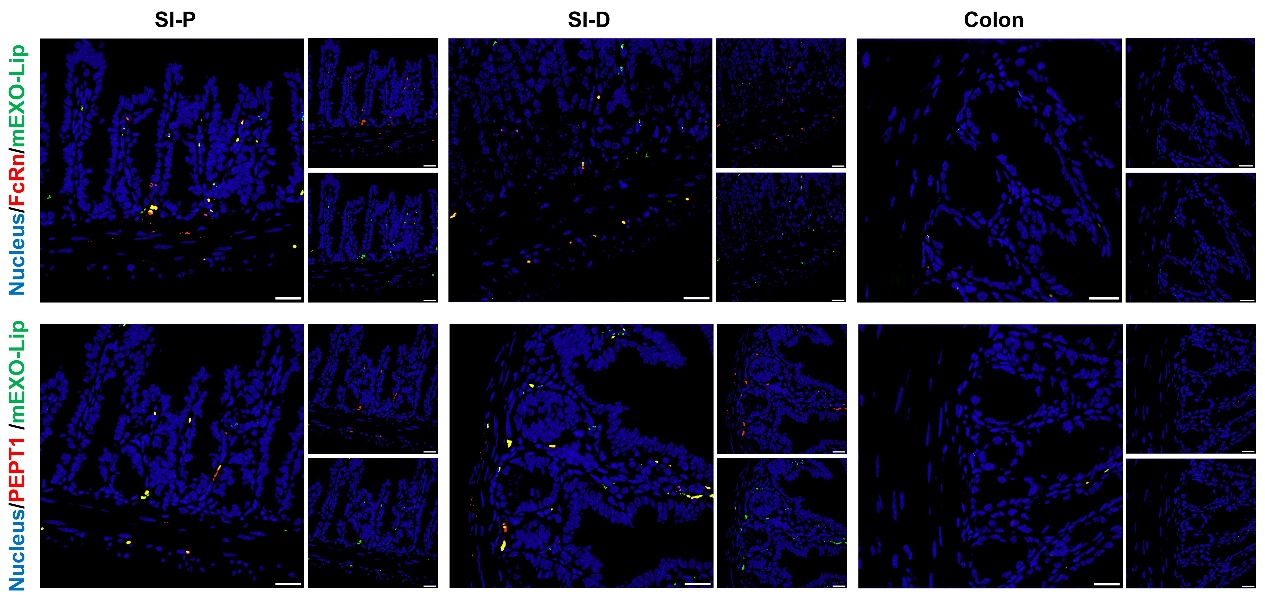


**Supplementary Fig. 9** Representative images of C6-labeled vesicles, FcRn, and PEPT1 in intestine. Blue: nucleus; Green: C6-labeled vesicles; Red: FcRn/PEPT1. Scale bars, 20 μm.

**Supplementary Table 1.** Characterization of Cef-loaded vesicles. Mean ± SD (*n* = 3).

| Samples | Size (nm) | PDI | Zeta potential (mV) | Encapsulation efficiency (%) |
| --- | --- | --- | --- | --- |
| Lip@Cef | 156.89 ± 3.61 | 0.24 ± 0.02 | -18.74 ± 1.80 | 50.27 ± 4.68****P*=0.0006 |
| mEXO@Cef | 128.30 ± 3.12 | 0.14 ± 0.02 | -9.95 ± 1.13 | 11.29 ± 3.26 |
| mEXO-Lip@Cef | 168.92 ± 2.64 | 0.23 ± 0.02 | -19.78 ± 2.06 | 56.02 ± 3.16****P*=0.0002 |

Statistical significance was determined using one-way ANOVA with a Tukey post hoc test. *** *P*＜0.001 versus mEXO@Cef.

**Supplementary Table 2.** Pharmaco kinetic parameters of Cef in mice. Mean ± SD (*n* = 5).

| Pharmacokinetic parameters | Free Cef | Lip@Cef | mEXO@Cef | mEXO-Lip@Cef |
| --- | --- | --- | --- | --- |
| T1/2 (h) | 89.94 ± 49.15 | 81.74 ± 25.39 | 80.52 ± 31.45 | 67.71 ± 33.73 |
| Tmax (h) | 36.00 ± 12.00 | 36.00 ± 12.00 | 54.00 ± 12.00 | 36.00 ± 12.00 |
| Cmax (μg/mL) | 3.31 ± 0.95 | 6.25 ± 1.65**P* =0.0153 | 7.95 ± 0.68*****P*<0.0001 | 11.52 ± 1.73*****P*<0.0001 |
| AUC0-t (μg/mL*min) | 408.68 ± 136.13 | 716.40 ± 54.46**P*=0.0460 | 1000.69 ± 105.38****P*=0.0001 | 1323.68 ± 242.44****P*=0.0002 |

Statistical significance was determined using one-way ANOVA with a Tukey post hoc test. * *P* < 0.05, *** *P* < 0.001, **** *P* < 0.0001 versus free Cef.
